# Supplementary material for: Bdelloid rotifers deploy horizontally acquired biosynthetic genes against a fungal pathogen
Source: PubMed Central journal article supplement (PMC11258130; doi:10.1038/s41467-024-49919-1), 2024-07-18
Supplement: 41467_2024_49919_MOESM3_ESM.pdf [file 41467_2024_49919_MOESM3_ESM.pdf]

## Reporting Summary

Nature Portfolio wishes to improve the reproducibility of the work that we publish. This form provides structure for consistency and transparency in reporting. For further information on Nature Portfolio policies, see our [Editorial Policies](#) and the [Editorial Policy Checklist](#).

### Statistics

For all statistical analyses, confirm that the following items are present in the figure legend, table legend, main text, or Methods section.

n/a Confirmed

- The exact sample size ( $n$ ) for each experimental group/condition, given as a discrete number and unit of measurement
- A statement on whether measurements were taken from distinct samples or whether the same sample was measured repeatedly
- The statistical test(s) used AND whether they are one- or two-sided  
*Only common tests should be described solely by name; describe more complex techniques in the Methods section.*
- A description of all covariates tested
- A description of any assumptions or corrections, such as tests of normality and adjustment for multiple comparisons
- A full description of the statistical parameters including central tendency (e.g. means) or other basic estimates (e.g. regression coefficient) AND variation (e.g. standard deviation) or associated estimates of uncertainty (e.g. confidence intervals)
- For null hypothesis testing, the test statistic (e.g.  $F$ ,  $t$ ,  $r$ ) with confidence intervals, effect sizes, degrees of freedom and  $P$  value noted  
*Give  $P$  values as exact values whenever suitable.*
- For Bayesian analysis, information on the choice of priors and Markov chain Monte Carlo settings
- For hierarchical and complex designs, identification of the appropriate level for tests and full reporting of outcomes
- Estimates of effect sizes (e.g. Cohen's  $d$ , Pearson's  $r$ ), indicating how they were calculated

*Our web collection on [statistics for biologists](#) contains articles on many of the points above.*

### Software and code

Policy information about [availability of computer code](#)

Data collection Manufacturer's software provided by Illumina was used for sequence data collection

Data analysis BBTools 'bbduk' v38.73 for read quality and adapter trimming;  
 BBTools 'tadpole' v38.73 for read error correction;  
 BBTools 'bbmap' v38.73 for RNA-seq read mapping;  
 STAR v2.7.3a for RNA-seq read mapping;  
 FastQC v0.11.6 and MultiQC v1.9 for sequence data QC and visualisation;  
 Trinity v2.8.9 for transcriptome assembly;  
 BUSCO v5 for gene completeness scoring;  
 Salmon 'quant' v0.14.1 for transcriptome quantification;  
 collate\_DE\_results.pl (custom script, <https://github.com/reubwn/bdelloid-immunity>) for collating HGT and DE results;  
 bootstrap\_collate\_DE\_results.pl (custom script, <https://github.com/reubwn/bdelloid-immunity>) for generating bootstrap samples of DE results;  
 get\_expression\_of\_orthologs.pl (custom script, <https://github.com/reubwn/bdelloid-immunity>) for obtaining expression values for identified pairs of orthologs;  
 R version 3.6.1 for core statistical analyses;  
 DESeq2\_1.26.0, edgeR\_3.28.1 and limma\_3.42.2 for differential expression analysis;  
 Minimap2 v2.17 for transcriptome mapping;  
 Trinotate v3.2.0, BLAST v2.10.1+, HMMER v3.3, SignalP v4.1 and TMHMM v2.0 for functional annotation of protein sequences;  
 goseq\_1.38.0 for GO analyses;

Diamond 'blastp' v0.9.21 for sequence alignment;  
 IQTREE v1.6.12 for phylogenetic reconstruction;  
 OrthoFinder v2.3.12 for orthology reconstruction;  
 AntiSMASH v6.1.1 for NRP/PKS annotation;  
 BEDTools v2.29.2 for genome context analyses;  
 SEMPI v2.0 and ChemDraw JS (version 19.0.0-CDJS-19.0.x.9+da9bec968) for secondary metabolite prediction and visualisation.

For manuscripts utilizing custom algorithms or software that are central to the research but not yet described in published literature, software must be made available to editors and reviewers. We strongly encourage code deposition in a community repository (e.g. GitHub). See the Nature Portfolio [guidelines for submitting code & software](#) for further information.

## Data

Policy information about [availability of data](#)

All manuscripts must include a [data availability statement](#). This statement should provide the following information, where applicable:

- Accession codes, unique identifiers, or web links for publicly available datasets
- A description of any restrictions on data availability
- For clinical datasets or third party data, please ensure that the statement adheres to our [policy](#)

All raw sequencing data generated by this study have been deposited in the relevant International Nucleotide Sequence Database Collaboration (INSDC) database with the BioProject ID PRJEB39927, with the SRA run accessions ERR4469891, ERR4469902–8, ERR4471099–102, ERR4471104–11, ERR4471113–6 (see Supplementary Table 8). This study also analysed publicly available data from BioProjects PRJEB1171, PRJEB23547, and PRJEB43248 (genome assemblies, gene annotations, TE annotations), and PRJNA494578 (RNA-seq data for the desiccation test).

## Research involving human participants, their data, or biological material

Policy information about studies with [human participants or human data](#). See also policy information about [sex, gender \(identity/presentation\), and sexual orientation](#) and [race, ethnicity and racism](#).

|                                                                    |    |
|--------------------------------------------------------------------|----|
| Reporting on sex and gender                                        | NA |
| Reporting on race, ethnicity, or other socially relevant groupings | NA |
| Population characteristics                                         | NA |
| Recruitment                                                        | NA |
| Ethics oversight                                                   | NA |

Note that full information on the approval of the study protocol must also be provided in the manuscript.

## Field-specific reporting

Please select the one below that is the best fit for your research. If you are not sure, read the appropriate sections before making your selection.

Life sciences  Behavioural & social sciences  Ecological, evolutionary & environmental sciences

For a reference copy of the document with all sections, see [nature.com/documents/nr-reporting-summary-flat.pdf](https://www.nature.com/documents/nr-reporting-summary-flat.pdf)

## Life sciences study design

All studies must disclose on these points even when the disclosure is negative.

|                 |                                                                                                                                                                                                                                                                                                                                                                                                                                                                                                                                                                                                                                                                                                                                    |
|-----------------|------------------------------------------------------------------------------------------------------------------------------------------------------------------------------------------------------------------------------------------------------------------------------------------------------------------------------------------------------------------------------------------------------------------------------------------------------------------------------------------------------------------------------------------------------------------------------------------------------------------------------------------------------------------------------------------------------------------------------------|
| Sample size     | Rotifer populations were subdivided to yield 16 replicates for each species, with approximately 1000 animals per sample for <i>A. ricciae</i> and 600 for <i>A. vaga</i> . Tubes were then randomly allocated to receive either live or irradiated pathogen spores of the fungal pathogen <i>R. globospora</i> , and to have RNA extracted either 7 or 24 hours later, with each combination replicated four times. Three of the four replicates in each category were taken forward to RNA-seq because this is the minimum standard for differential expression transcriptomics.                                                                                                                                                  |
| Data exclusions | Unwanted ribosomal RNA (rRNA) reads were removed by mapping to the SILVA rRNA database using BBTools 'bbmap'. Contaminant reads derived from either the bacterial rotifer food ( <i>E. coli</i> strain OP50) or from the fungal pathogen itself were removed using a similar approach, mapping to sequenced genomes of fungi in the family Clavicipitaceae (NCBI taxid 34397) or to the OP50 genome (see Supplementary Methods for further details). These are standard exclusions for transcriptomic analyses to ensure only target reads are included, and were pre-established. Selection of the three RNA replicates to take forward to sequencing was on the basis of initial RNA quality metrics (highest yield and purity). |
| Replication     | Core statistical analyses were replicated using de novo transcriptomes assembled and annotated directly from RNA-seq data, rather than based on previously published genome data. The same conclusions are reached in both cases (see Supplementary Methods for further details). Transcriptomic analyses were replicated using three different RNA-seq analysis pipelines and with multiple significance thresholds                                                                                                                                                                                                                                                                                                               |

with nearly identical results (detailed in Supplementary Methods).

Randomization Tubes were randomly allocated to receive either live or irradiated pathogen spores.

Blinding The investigator who conducted the statistical analyses (Reuben W. Nowell) was blind to the group allocation (pathogen vs control) of RNA-seq libraries until after the primary analyses were conducted.

## Behavioural & social sciences study design

All studies must disclose on these points even when the disclosure is negative.

Study description NA

Research sample NA

Sampling strategy NA

Data collection NA

Timing NA

Data exclusions NA

Non-participation NA

Randomization NA

## Ecological, evolutionary & environmental sciences study design

All studies must disclose on these points even when the disclosure is negative.

Study description NA

Research sample NA

Sampling strategy NA

Data collection NA

Timing and spatial scale NA

Data exclusions NA

Reproducibility NA

Randomization NA

Blinding NA

Did the study involve field work?  Yes  No

## Field work, collection and transport

Field conditions NA

Location NA

Access & import/export NA

Disturbance NA

# Reporting for specific materials, systems and methods

We require information from authors about some types of materials, experimental systems and methods used in many studies. Here, indicate whether each material, system or method listed is relevant to your study. If you are not sure if a list item applies to your research, read the appropriate section before selecting a response.

## Materials & experimental systems

- n/a  Involved in the study
- Antibodies
- Eukaryotic cell lines
- Palaeontology and archaeology
- Animals and other organisms
- Clinical data
- Dual use research of concern
- Plants

## Methods

- n/a  Involved in the study
- ChIP-seq
- Flow cytometry
- MRI-based neuroimaging

## Antibodies

Antibodies used

Validation

## Eukaryotic cell lines

Policy information about [cell lines and Sex and Gender in Research](#)

Cell line source(s)

Authentication

Mycoplasma contamination

Commonly misidentified lines (See [ICLAC](#) register)

## Palaeontology and Archaeology

Specimen provenance

Specimen deposition

Dating methods

Tick this box to confirm that the raw and calibrated dates are available in the paper or in Supplementary Information.

Ethics oversight

Note that full information on the approval of the study protocol must also be provided in the manuscript.

## Animals and other research organisms

Policy information about [studies involving animals](#); [ARRIVE guidelines](#) recommended for reporting animal research, and [Sex and Gender in Research](#)

Laboratory animals

Wild animals

Reporting on sex

Field-collected samples

## Ethics oversight

Note that full information on the approval of the study protocol must also be provided in the manuscript.

## Clinical data

Policy information about [clinical studies](#)

All manuscripts should comply with the ICMJE [guidelines for publication of clinical research](#) and a completed [CONSORT checklist](#) must be included with all submissions.

Clinical trial registration

Study protocol

Data collection

Outcomes

## Dual use research of concern

Policy information about [dual use research of concern](#)

### Hazards

Could the accidental, deliberate or reckless misuse of agents or technologies generated in the work, or the application of information presented in the manuscript, pose a threat to:

- | No                       | Yes                      |                            |
|--------------------------|--------------------------|----------------------------|
| <input type="checkbox"/> | <input type="checkbox"/> | Public health              |
| <input type="checkbox"/> | <input type="checkbox"/> | National security          |
| <input type="checkbox"/> | <input type="checkbox"/> | Crops and/or livestock     |
| <input type="checkbox"/> | <input type="checkbox"/> | Ecosystems                 |
| <input type="checkbox"/> | <input type="checkbox"/> | Any other significant area |

### Experiments of concern

Does the work involve any of these experiments of concern:

- | No                       | Yes                      |                                                                             |
|--------------------------|--------------------------|-----------------------------------------------------------------------------|
| <input type="checkbox"/> | <input type="checkbox"/> | Demonstrate how to render a vaccine ineffective                             |
| <input type="checkbox"/> | <input type="checkbox"/> | Confer resistance to therapeutically useful antibiotics or antiviral agents |
| <input type="checkbox"/> | <input type="checkbox"/> | Enhance the virulence of a pathogen or render a nonpathogen virulent        |
| <input type="checkbox"/> | <input type="checkbox"/> | Increase transmissibility of a pathogen                                     |
| <input type="checkbox"/> | <input type="checkbox"/> | Alter the host range of a pathogen                                          |
| <input type="checkbox"/> | <input type="checkbox"/> | Enable evasion of diagnostic/detection modalities                           |
| <input type="checkbox"/> | <input type="checkbox"/> | Enable the weaponization of a biological agent or toxin                     |
| <input type="checkbox"/> | <input type="checkbox"/> | Any other potentially harmful combination of experiments and agents         |

## Plants

Seed stocks

Novel plant genotypes

Authentication

## ChIP-seq

### Data deposition

- Confirm that both raw and final processed data have been deposited in a public database such as [GEO](#).
- Confirm that you have deposited or provided access to graph files (e.g. BED files) for the called peaks.

|                                                                    |    |
|--------------------------------------------------------------------|----|
| Data access links<br><i>May remain private before publication.</i> | NA |
| Files in database submission                                       | NA |
| Genome browser session<br>(e.g. <a href="#">UCSC</a> )             | NA |

## Methodology

|                         |    |
|-------------------------|----|
| Replicates              | NA |
| Sequencing depth        | NA |
| Antibodies              | NA |
| Peak calling parameters | NA |
| Data quality            | NA |
| Software                | NA |

## Flow Cytometry

### Plots

Confirm that:

- The axis labels state the marker and fluorochrome used (e.g. CD4-FITC).
- The axis scales are clearly visible. Include numbers along axes only for bottom left plot of group (a 'group' is an analysis of identical markers).
- All plots are contour plots with outliers or pseudocolor plots.
- A numerical value for number of cells or percentage (with statistics) is provided.

### Methodology

|                           |    |
|---------------------------|----|
| Sample preparation        | NA |
| Instrument                | NA |
| Software                  | NA |
| Cell population abundance | NA |
| Gating strategy           | NA |

Tick this box to confirm that a figure exemplifying the gating strategy is provided in the Supplementary Information.

## Magnetic resonance imaging

### Experimental design

|                                 |    |
|---------------------------------|----|
| Design type                     | NA |
| Design specifications           | NA |
| Behavioral performance measures | NA |

### Acquisition

|                               |    |
|-------------------------------|----|
| Imaging type(s)               | NA |
| Field strength                | NA |
| Sequence & imaging parameters | NA |
| Area of acquisition           | NA |

Diffusion MRI  Used  Not used

## Preprocessing

Preprocessing software

Normalization

Normalization template

Noise and artifact removal

Volume censoring

## Statistical modeling & inference

Model type and settings

Effect(s) tested

Specify type of analysis:  Whole brain  ROI-based  Both

Statistic type for inference

(See [Eklund et al. 2016](#))

Correction

## Models & analysis

| n/a                      | Involvement in the study |                                              |
|--------------------------|--------------------------|----------------------------------------------|
| <input type="checkbox"/> | <input type="checkbox"/> | Functional and/or effective connectivity     |
| <input type="checkbox"/> | <input type="checkbox"/> | Graph analysis                               |
| <input type="checkbox"/> | <input type="checkbox"/> | Multivariate modeling or predictive analysis |

Functional and/or effective connectivity

Graph analysis

Multivariate modeling and predictive analysis
